# Supplementary material for: microRNA-210-3p depletion by CRISPR/Cas9 promoted tumorigenesis through revival of TWIST1 in renal cell carcinoma
Source: PubMed Central journal article supplement (PMC5400553; doi:10.18632/oncotarget.14930), 2017-02-01
Supplement: oncotarget-08-20881-s001.pdf [file oncotarget-08-20881-s001.pdf]

# **microRNA-210-3p depletion by CRISPR/Cas9 promoted tumorigenesis through revival of TWIST1 in renal cell carcinoma**

## **SUPPLEMENTARY FIGURES AND TABLES**

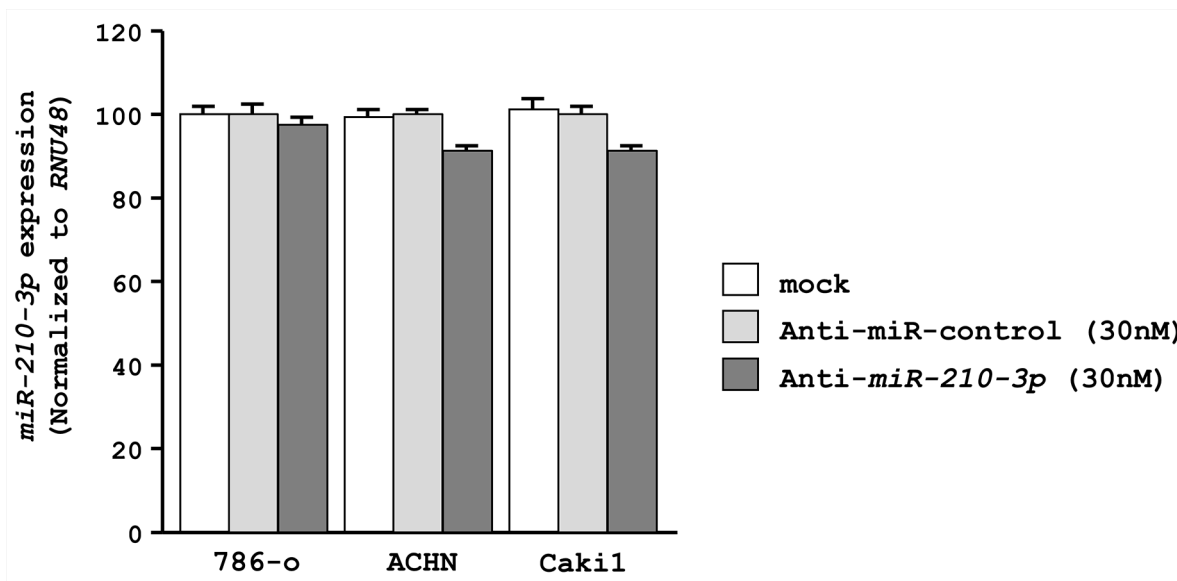

**Supplementary Figure 1: The expression levels of *miR-210-3p* in RCC cell lines transfected with anti-miRNA.** qRT-PCR data showing that the expression levels of *miR-210-3p* were not decreased by anti-miRNA in 786-o, A498, and Caki2 RCC cell lines.

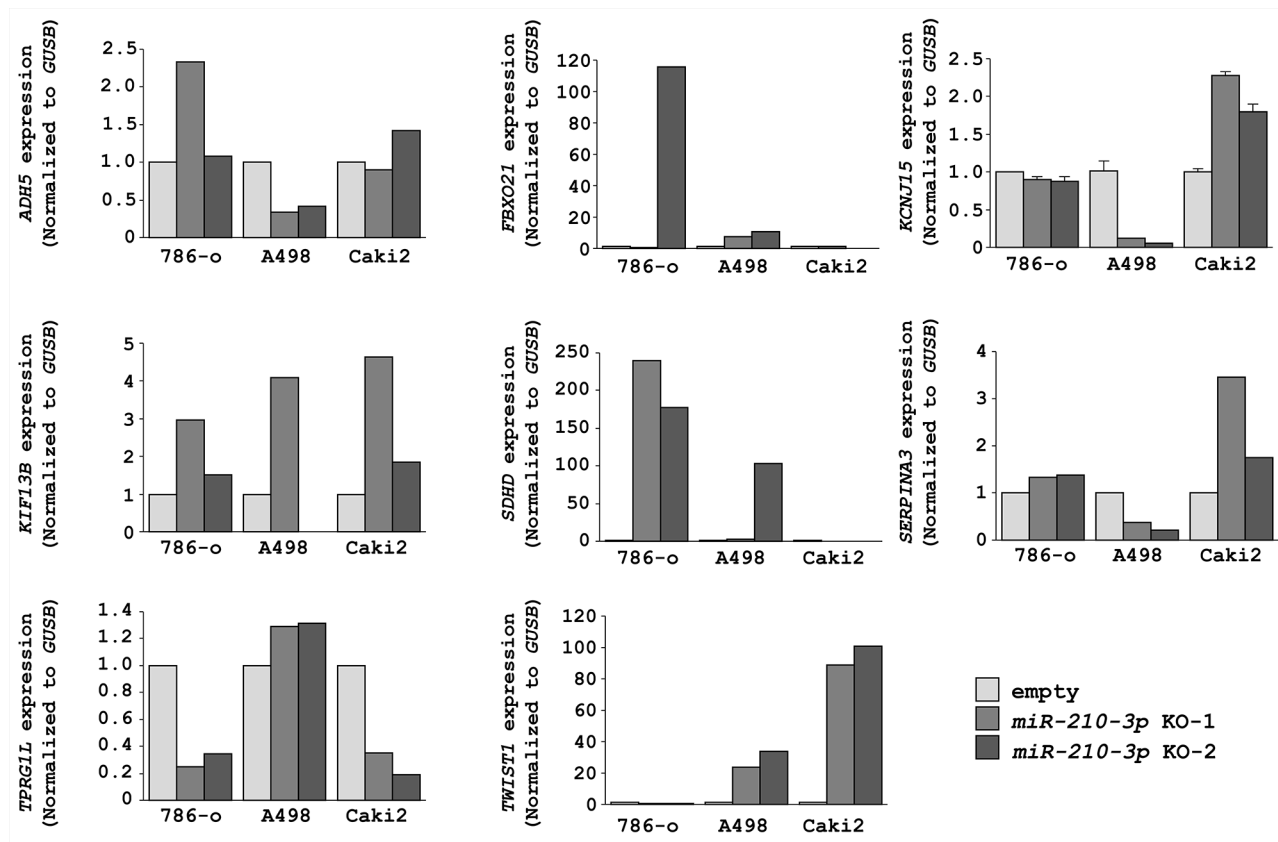

**Supplementary Figure 2: mRNA expression levels of the candidate target genes of *miR-210-3p*.** qRT-PCR showing the expression levels of *ADH5*, *FBXO21*, *KCNJ15*, *KIF13B*, *SDHD*, *SERPINA3*, *TPRGIL*, *TWIST1* in *miR-210-3p*-depleted 786-o, A498 and Caki2 cell lines.

**Supplementary Table 1: Patient characteristics**

| <b>Renal cancer</b>      |      |         |
|--------------------------|------|---------|
| Total number             | 40   |         |
| Median Age (range)       | 66.5 | (41-89) |
| Gender                   |      |         |
| Male                     | 28   | 70.0%   |
| Female                   | 12   | 30.0%   |
| Pathological tumor stage |      |         |
| pT1a                     | 20   | 50.0%   |
| pT1b                     | 13   | 32.5%   |
| pT2                      | 0    | 0%      |
| pT3a                     | 4    | 10.0%   |
| pT3b                     | 3    | 7.5%    |
| pT4                      | 0    | 0%      |
| Tumor grade              |      |         |
| G1                       | 3    | 7.5%    |
| G2                       | 30   | 75.0%   |
| G3                       | 6    | 15.0%   |
| unknown                  | 1    | 2.5%    |
| Metastasis               |      |         |
| M 0                      | 36   | 90.0%   |
| M 1                      | 2    | 5.0%    |
| unknown                  | 2    | 5.0%    |
| Venous invasion          |      |         |
| v 0                      | 25   | 62.5%   |
| v 1                      | 15   | 37.5%   |

Supplementary Table 2: Sequences of each gene

| Gene name | NCBI GeneID | Species | Forward                 | Reverse                 |
|-----------|-------------|---------|-------------------------|-------------------------|
| GUSB      | 2990        | Human   | CGTCCCACCTAGAATCTGCT    | TTGCTCACAAAGGTCACAGG    |
| KCNJ15    | 3772        | Human   | CCGCGTCATGTCCAAGAGT     | TGCAGGTAGAGTAGGTATATGCC |
| TWIST     | 7291        | Human   | GTCCGCAGTCTTACGAGGAG    | GCTTGAGGGTCTGAATCTTGCT  |
| SERPINA3  | 12          | Human   | CCTGAAGGCCCTGATAAGAA    | GCTGGACTGATTGAGGGTGC    |
| FBXO21    | 23014       | Human   | GAGGTGGCCTTCCCTTATGAA   | CCCAGCTTTTTGCCGAACCTTA  |
| KIF13B    | 23303       | Human   | AGCCGAAGGTGTTTGCTTATG   | TGAGTTCGTTCAAAGAGTCCACT |
| SDHD      | 6392        | Human   | ATTTCTTCAGGACCGACCTATCC | CAGCCTTGGAGCCAGAATG     |
| TPRG1L    | 127262      | Human   | CAACGCAGTAGACACCATTTC   | CCAAAACCTTCTCGCTTGTT    |
| ADH5      | 128         | Human   | ATGGCGAACGAGGTTATCAAG   | CATGTCCCAAGATCACTGGAAAA |
| RAD52     | 5893        | Human   | CCAGAAGGTGTGCTACATTGAG  | ACAGACTCCCACGTAGAACTTG  |
| EFNA3     | 1944        | Human   | CATGCGGTGTACTGGAACAG    | AGATAGTCGTTACGTTACCT    |
